# Supplementary material for: Cell-mimic polymersome-shielded islets for long-term immune protection of neonatal porcine islet-like cell clusters
Source: Royal Society of Chemistry journal article supplement (doi:10.1039/c9tb02270h), 2020-01-01
Supplement: c9tb02270h1.pdf [file c9tb02270h1.pdf]

Electronic Supplementary Information for

# Cell mimic polymersomes-shielded islets for long-term immune protection of neonatal porcine islet-like cell clusters

*Hyun-Ouk Kim<sup>a, ‡</sup>, Sang Hoon Lee<sup>b, c, ‡</sup>, Woonsung Na<sup>d</sup>, Jong-Woo Lim<sup>e</sup>, Geunseon Park<sup>e</sup>, Chaewon Park<sup>e</sup>, Hwunjae Lee<sup>f</sup>, Aram Kang<sup>a</sup>, Seungjoo Haam<sup>e</sup>, Inho Choi<sup>c</sup>, Jung-Taek Kang<sup>b, \*</sup>, and Daesub Song<sup>a, \*</sup>*

<sup>a</sup> Department of Pharmacy, College of Pharmacy, Korea University, Sejong 30019, Republic of Korea, E-mail: sds1@korea.ac.kr

<sup>b</sup> MGENPLUS Biotechnology Research Institute, Seoul, 08511, Republic of Korea

<sup>c</sup> Department of Pharmaceutical Engineering, Hoseo University, Asan, 336-795 Republic of Korea

<sup>d</sup> College of Veterinary Medicine, Chonnam National University, Gwangju 61186, Republic of Korea

<sup>e</sup> Department of Chemical & Biomolecular Engineering, Yonsei University, Seoul 03722, Republic of Korea

<sup>f</sup> Department of Radiology, College of Medicine, Yonsei University, YUHS-KRIBB Medical Convergence Research Institute, Seoul 03722, Republic of Korea

‡ These authors contributed equally.

\*Correspondence should be addressed to J. -T. K (E-mail: exodus119@hanmail.net) and D. S. (E-mail: sds1@korea.ac.kr)

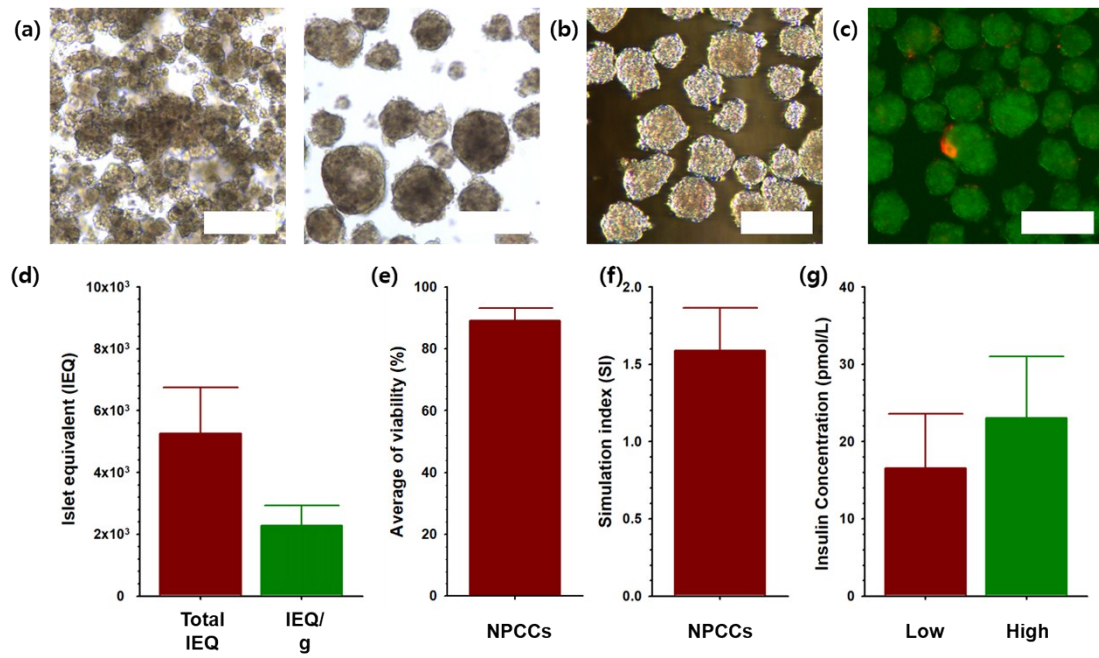

**Fig S1. Characterization and yield of NPCCs.** (a) Light microscopic images of NPCCs after isolation at days 0 and 5. (b) NPCCs stained with DTZ. Scale bar: 200  $\mu\text{m}$ . (c) NPCC yields expressed as both total IEG (islet equivalents) and IEG per gram of NPCCs. (d) Average of viability was measured by AOPI staining after islet isolation. (e) Stimulation index for glucose-stimulated insulin secretion. (f) Glucose stimulated insulin secretion during culture. Secreted insulin after 5 days.

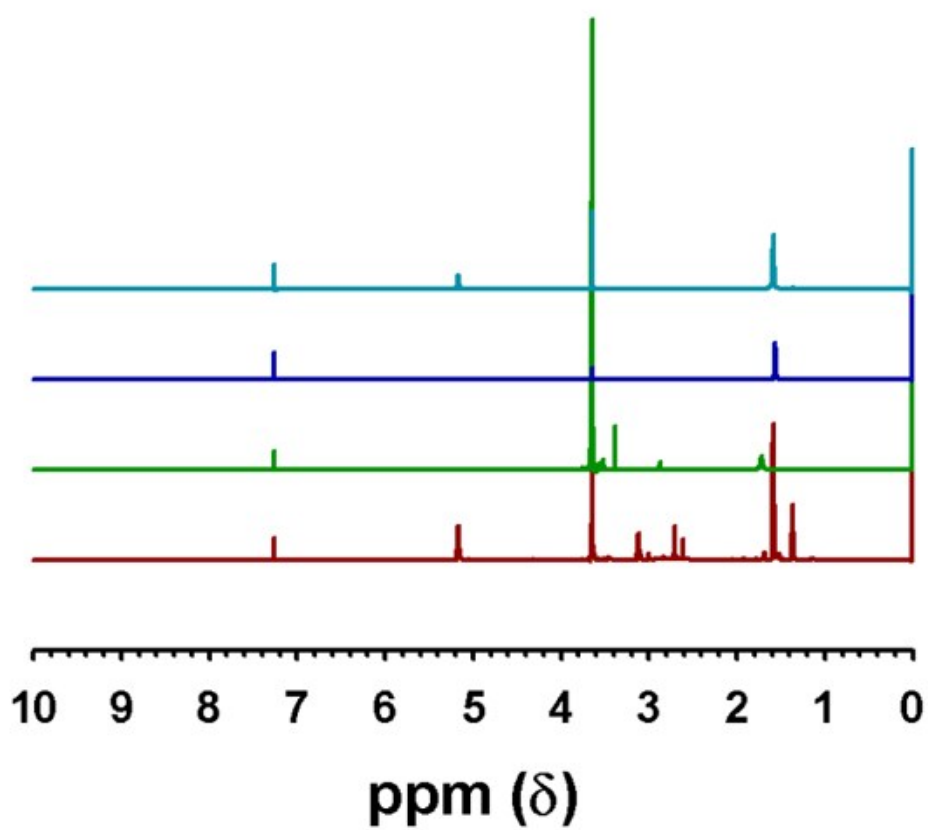

**Fig S2. Verification of NHS-, NH<sub>2</sub>-, OH- and m-PEG-b-PLA copolymers.**  $^1\text{H}$  NMR spectra of (i) NHS-, (ii) NH<sub>2</sub>-, (iii) COOH- and (iv) m-PEG-b-PLA.

**Table S1.** Yield, viability, simulation index (SI), and insulin secretion of NPCCs

| Lot NO. | Total NPCCs yield (IEQ, day 5) | NPCCs yield (IEQ/gram, pancreas weight) | Viability (% , AOPI) | SI  | Insulin secreted |      |
|---------|--------------------------------|-----------------------------------------|----------------------|-----|------------------|------|
|         |                                |                                         |                      |     | Low              | High |
| 1       | 130,552.7                      | 12,553.1                                | 85.1                 | 1.8 | 12.2             | 16.7 |
| 2       | 80,921.0                       | 17,983.0                                | 92.7                 | 1.2 | 28.0             | 32.8 |
| 3       | 154,846.0                      | 27,651.0                                | 84.0                 | 1.5 | 10.2             | 15.2 |
| 4       | 141,487.0                      | 27,209.0                                | 90.8                 | 1.5 | 21.5             | 32.7 |
| 5       | 135,299.0                      | 28,787.0                                | 93.7                 | 2.0 | 10.7             | 17.8 |
| Aver    |                                | 22,836.6                                | 89.3                 | 1.6 | 16.5             | 23.0 |
| STD     |                                | 6,434.4                                 | 4.0                  | 0.3 | 7.0              | 8.0  |
